# Supplementary material for: Hepatitis B Virus-X Downregulates Expression of Selenium Binding Protein 1
Source: MDPI journal article supplement (doi:10.3390/v12050565), 2020-05-20
Supplement: s1 [file s1]

**Table S1. Genes downregulated in Chang X31 cells, cDNA microarray**

| <b>Gene</b>     | <b>Description</b>                               | <b>NCBI #</b>     | <b>1</b>    | <b>2</b>    |
|-----------------|--------------------------------------------------|-------------------|-------------|-------------|
| POR             | P450(cytochrome) oxidoreductase                  | Hs. 167246        | -4.9        | -4.0        |
| PSME1           | Proteasome activator subunit 1(PA28 alpha)       | Hs. 75348         | -3.2        | -2.8        |
| PGM1            | Phosphoglucomutase 1                             | Hs. 1869          | -3.0        | -3.0        |
| ZNF76           | Zinc finger protein 76                           | Hs. 29222         | -3.0        | -2.3        |
| FBLN2           | Fibulin 2                                        | Hs. 198862        | -4.6        | -3.9        |
| <b>SELENBP1</b> | <b>Selenim binding protein 1</b>                 | <b>Hs. 334841</b> | <b>-4.6</b> | <b>-4.0</b> |
| TUBA1           | Tubulin, alpha 1(testis specific)                | Hs. 75318         | -2.4        | -2.2        |
| PGM1            | Phosphoglucomutase 1                             | Hs. 1869          | -3.7        | -2.6        |
| MGST3           | Microsomal glutathione S-transferase 3           | Hs. 111811        | -3.1        | -2.8        |
| MOV10           | Mov10, Moloney leukemia virus 10, homolog(mouse) | Hs. 20725         | -3.2        | -2.3        |
| CKMT1           | Creatine kinase, mitochondrial 1 (ubiquitous)    | Hs. 153998        | -2.2        | -2.6        |
| CHN2            | Chimerin (chimerin) 2                            | Hs. 286055        | -2.2        | -2.4        |
| P100            | EBNA-2 co-activator (100kD)                      | Hs. 79093         | -2.6        | -5.2        |
| RXRA            | Retinoid X receptor, alpha                       | Hs. 20084         | -2.0        | -2.6        |
| RPS10           | Ribosomal protein S10                            | Hs. 76230         | -2.6        | -3.0        |

Chang (normal liver cell) and Chang X31 (Chang cells transfected with pRcCMB-HBx, stably expressing HBx) were compared. RNAs were prepared with RNeasy Midi kit (Qiagen, CA, USA) and cDNA array was performed. Experiments were repeated twice using different RNAs, harvested independently. Downregulated genes related to reactive oxygen species (ROS) are listed above.
