# Supplementary material for: Hepatitis B Virus-X Downregulates Expression of Selenium Binding Protein 1
Source: MDPI journal article supplement (doi:10.3390/v12050565), 2020-05-20
Supplement: s1 [file s1]

**Table S2. Relationship between SELENBP1 expression and clinicopathological factors**

|               | Intensity of SELENBP1 staining |    |    |     | No. of cases | P-value |
|---------------|--------------------------------|----|----|-----|--------------|---------|
|               | -                              | +  | ++ | +++ |              |         |
| <b>Normal</b> |                                |    |    |     |              |         |
| Virus         |                                |    |    |     |              |         |
| HBV           | 2                              | 9  | 19 | 18  | 48           | 0.811   |
| Non-HBV       | 1                              | 3  | 5  | 3   | 12           |         |
| Gender        |                                |    |    |     |              |         |
| Male          | 1                              | 11 | 21 | 16  | 49           | 0.086   |
| Female        | 2                              | 2  | 2  | 5   | 11           |         |
| Grade         |                                |    |    |     |              |         |
| 2             | 2                              | 3  | 14 | 13  | 32           | 0.751   |
| 3             | 1                              | 4  | 8  | 7   | 20           |         |
| <b>Tumor</b>  |                                |    |    |     |              |         |
| Virus         |                                |    |    |     |              |         |
| HBV           | 16                             | 22 | 6  | 4   | 48           | 0.383   |
| Non-HBV       | 7                              | 4  | 1  | 0   | 12           |         |
| Gender        |                                |    |    |     |              |         |
| Male          | 18                             | 22 | 5  | 4   | 49           | 0.633   |
| Female        | 5                              | 4  | 2  | 0   | 11           |         |
| Grade         |                                |    |    |     |              |         |
| 2             | 13                             | 12 | 4  | 3   | 32           | 0.888   |
| 3             | 7                              | 9  | 3  | 1   | 20           |         |

Normal and tumor samples from HCC patients were analyzed for SELENBP1 expression. Samples were categorized and analyzed according to clinicopathological factors, such as hepatitis virus, gender and tumor grades. Expression level of SELENBP1 had no correlation with clinicopathological factors of HCC. Chi-square tests were applied and the level of significance was taken as  $p < 0.05$ .
